# Supplementary figures and images for: Five-Year Mental Health Care Use by Patients Referred to Collaborative Care or to Specialized Care
Source: Atypon-hosted journal article supplement (doi:10.1176/appi.ps.201400238), 2015-05-01

Figure 1. Flow Diagram

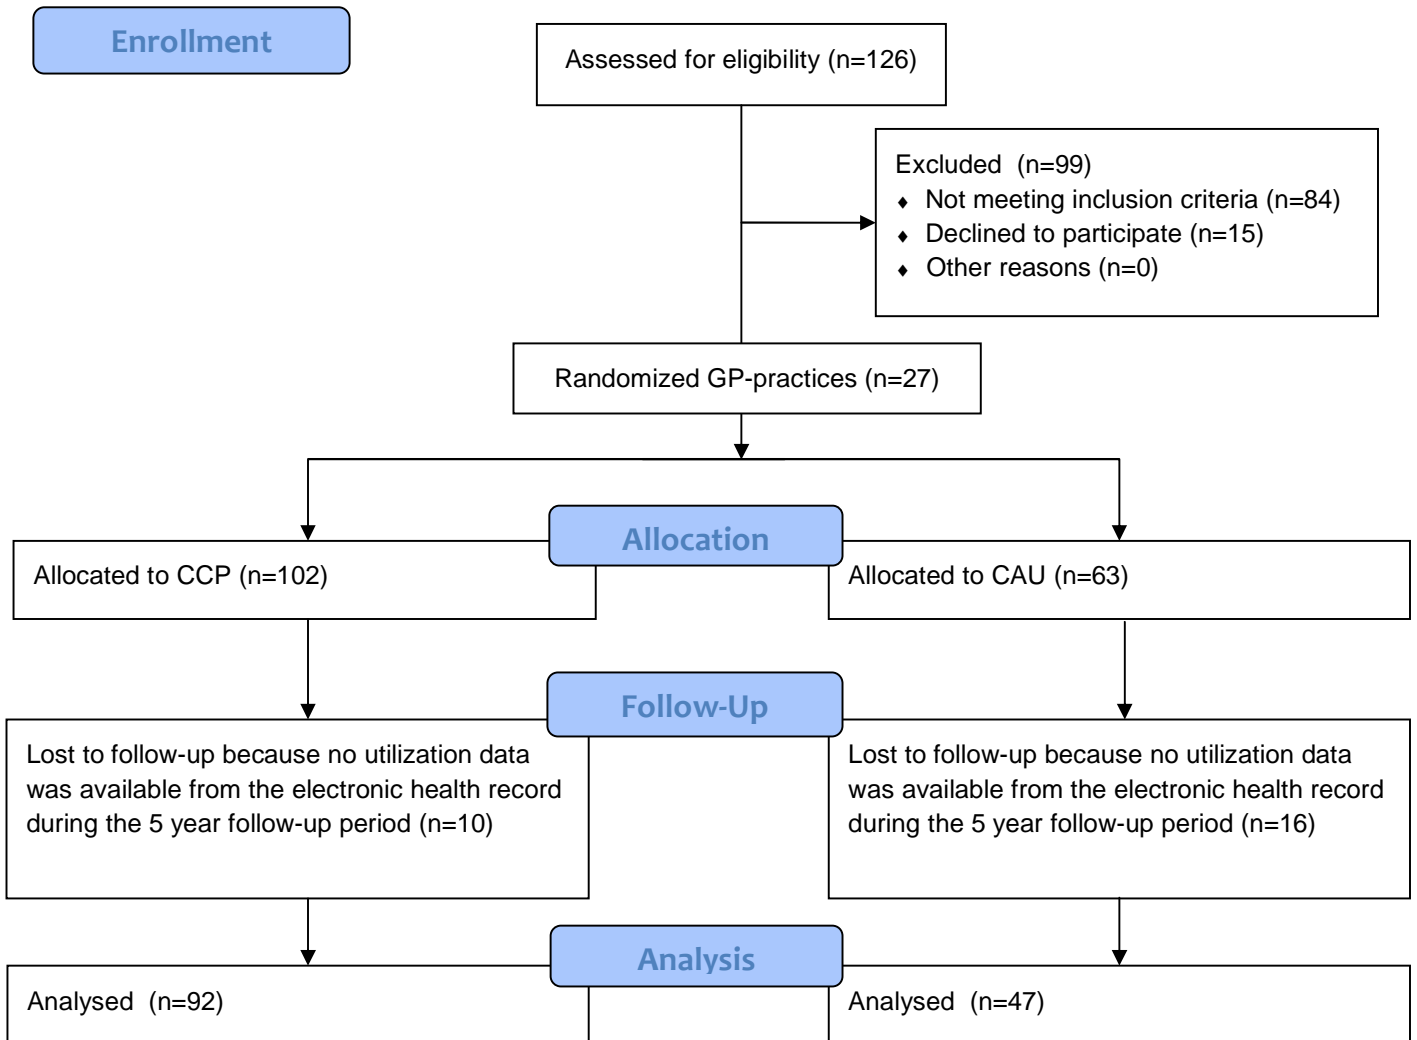

Supplement: appi.ps.201400238.ds001.pdf [file appi.ps.201400238.ds001.pdf]
